# Supplementary material
Source: Springer Nature journal article supplement (https://www.springermedizin.de/resource/supplementary/12902_2014_285_MOESM2_ESM.pdf/9515948)

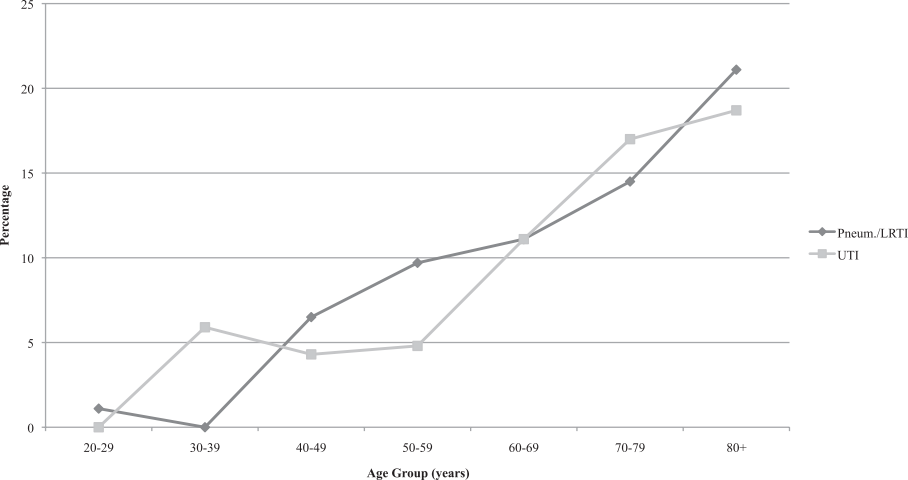

Supplement: MOESM2 [file 9515948]
